# Supplementary material
Source: ML conference proceedings conference paper supplement (https://proceedings.mlr.press/v84/naesseth18a.html)
Supplement: Supplementary file 1 [file naesseth18a-supp.pdf]

## A Variational Sequential Monte Carlo – Supplementary Material

### A.1 Proof of Proposition 1

We start by noting that the distribution of all random variables generated by the vSMC algorithm is given by

$$\tilde{\phi}(x_{1:T}^{1:N}, a_{1:T-1}^{1:N}, b_T; \lambda) = \frac{w_T^{b_T}}{\sum_{\ell} w_T^{\ell}} \prod_{i=1}^N r(x_1^i; \lambda) \cdot \prod_{t=2}^T \prod_{i=1}^N \frac{w_{t-1}^{a_{t-1}^i}}{\sum_{\ell} w_{t-1}^{\ell}} r(x_t^i | x_{t-1}^{a_{t-1}^i}; \lambda). \quad (12)$$

We are interested in the marginal distribution  $q(x_{1:T}; \lambda) \triangleq \tilde{\phi}(x_{1:T}; \lambda) = \mathbb{E}_{b_{1:T}}[\tilde{\phi}(x_{1:T}^{b_{1:T}}, b_{1:T}; \lambda)]$ . A key observation is that the distribution of  $b_{1:T} | x_{1:T}$ , the conditional distribution of the ancestral path of the returned particle, is uniform on  $\{1, \dots, N\}^T$ . Thus we get

$$q(x_{1:T}; \lambda) = \frac{\tilde{\phi}(x_{1:T}^{b_{1:T}}, b_{1:T}; \lambda)}{\tilde{\phi}(b_{1:T} | x_{1:T}; \lambda)} = \frac{1}{N^{-T}} \sum_{\substack{a_{1:T-1} \\ a_{1:T-1} \neq b_{1:T-1}}} \int \tilde{\phi}(x_{1:T}^{b_{1:T}}, x_{1:T}^{-b_{1:T}}, a_{1:T-1}^{-b_{1:T-1}}; \lambda) dx_{1:T}^{-b_{1:T}}, \quad (13)$$

where

$$\begin{aligned} & \frac{1}{N^{-T}} \tilde{\phi}(x_{1:T}^{b_{1:T}}, x_{1:T}^{-b_{1:T}}, a_{1:T-1}^{-b_{1:T-1}}; \lambda) \\ &= N^T \frac{w_1^{b_1}}{\sum_{\ell} w_1^{\ell}} r(x_1^{b_1}; \lambda) \prod_{t=2}^T \frac{w_t^{b_t}}{\sum_{\ell} w_t^{\ell}} r(x_t^{b_t} | x_{t-1}^{b_{t-1}}; \lambda) \cdot \prod_{\substack{i=1 \\ i \neq b_t}}^N r(x_1^i; \lambda) \cdot \prod_{t=2}^T \prod_{\substack{i=1 \\ i \neq b_t}}^N \frac{w_{t-1}^{a_{t-1}^i}}{\sum_{\ell} w_{t-1}^{\ell}} r(x_t^i | x_{t-1}^{a_{t-1}^i}; \lambda) \\ &= p(x_1^{b_1}, y_1) \prod_{t=2}^T \frac{p(x_{1:t}^{b_{1:t}}, y_{1:t})}{p(x_{1:t-1}^{b_{1:t-1}}, y_{1:t-1})} \prod_{t=1}^T \frac{1}{\sum_{\ell} w_t^{\ell}} \cdot \prod_{\substack{i=1 \\ i \neq b_t}}^N r(x_1^i; \lambda) \cdot \prod_{t=2}^T \prod_{\substack{i=1 \\ i \neq b_t}}^N \frac{w_{t-1}^{a_{t-1}^i}}{\sum_{\ell} w_{t-1}^{\ell}} r(x_t^i | x_{t-1}^{a_{t-1}^i}; \lambda) \\ &= p(x_{1:T}^{b_{1:T}}, y_{1:T}) \prod_{t=1}^T \frac{1}{\sum_{\ell} w_t^{\ell}} \cdot \tilde{\phi}(x_{1:T}^{-b_{1:T}}, a_{1:T-1}^{-b_{1:T-1}}; \lambda). \end{aligned}$$

We insert the above expression in (13) and we get

$$\begin{aligned} q(x_{1:T}; \lambda) &= p(x_{1:T}^{b_{1:T}}, y_{1:T}) \sum_{\substack{a_{1:T-1} \\ a_{1:T-1} \neq b_{1:T-1}}} \int \left( \prod_{t=1}^T \frac{1}{\sum_{i=1}^N w_t^i} \right)^{-1} \cdot \tilde{\phi}(x_{1:T}^{-b_{1:T}}, a_{1:T-1}^{-b_{1:T-1}}; \lambda) dx_{1:T}^{-b_{1:T}} \\ &= p(x_{1:T}^{b_{1:T}}, y_{1:T}) \mathbb{E}_{\tilde{\phi}(x_{1:T}^{-b_{1:T}}, a_{1:T-1}^{-b_{1:T-1}}; \lambda)} \left[ \left( \prod_{t=1}^T \frac{1}{\sum_{i=1}^N w_t^i} \right)^{-1} \right]. \end{aligned} \quad (14)$$

□

### A.2 Proof of Theorem 1

The evidence lower bound (ELBO), using the above result about the distribution of  $q(x_{1:T}; \lambda)$ , is given by

$$\begin{aligned} \mathcal{L}(\lambda) &= \mathbb{E}_{q(x_{1:T}; \lambda)} [\log p(x_{1:T}, y_{1:T}) - \log q(x_{1:T}; \lambda)] \\ &= - \int \left\{ p(x_{1:T}^{b_{1:T}}, y_{1:T}) \mathbb{E}_{\tilde{\phi}(x_{1:T}^{-b_{1:T}}, a_{1:T-1}^{-b_{1:T-1}}; \lambda)} \left[ \frac{1}{\prod_{t=1}^T \frac{1}{\sum_{i=1}^N w_t^i}} \right] \right. \\ &\quad \left. \cdot \log \mathbb{E}_{\tilde{\phi}(x_{1:T}^{-b_{1:T}}, a_{1:T-1}^{-b_{1:T-1}}; \lambda)} \left[ \frac{1}{\prod_{t=1}^T \frac{1}{\sum_{i=1}^N w_t^i}} \right] \right\} dx_{1:T}^{b_{1:T}}. \end{aligned} \quad (15)$$

Note that  $-t \log t$  is a concave function for  $t > 0$ , this means by the conditional Jensen's inequality we have  $-\mathbb{E}[t \log \mathbb{E}[t]] \geq -\mathbb{E}[t \log t]$ . If we apply this to (15) we get

$$\begin{aligned} \mathcal{L}(\lambda) &\geq \int \mathbb{E}_{\tilde{\phi}(x_{1:T}^{-b_{1:T}}, a_{1:T-1}^{-b_{1:T-1}}; \lambda)} \left[ \frac{p(x_{1:T}^{b_{1:T}}, y_{1:T})}{\prod_{t=1}^T \frac{1}{N} \sum_{i=1}^N w_t^i} \sum_{t=1}^T \log \left( \frac{1}{N} \sum_{i=1}^N w_t^i \right) \right] dx_{1:T}^{b_{1:T}} \\ &= \mathbb{E}_{\tilde{\phi}(x_{1:T}^{1:N}, a_{1:T-1}^{1:N}; \lambda)} \left[ \sum_{t=1}^T \log \left( \frac{1}{N} \sum_{i=1}^N w_t^i \right) \right] = \tilde{\mathcal{L}}(\lambda), \end{aligned}$$

where the last step follows because  $q(x_{1:T}; \lambda)$  is the marginal of  $\tilde{\phi}(x_{1:T}^{1:N}, a_{1:T-1}^{1:N}; \lambda)$ .  $\square$

### A.3 Stochastic Optimization

For the control variates we use

$$\sum_{t=2}^T c_t \mathbb{E}_{s(\cdot) \tilde{\phi}(\cdot; \lambda)} \left[ \sum_{i=1}^N \nabla \log w_{t-1}^{a_{t-1}^i} - \sum_{\ell=1}^N \frac{w_{t-1}^\ell}{\sum_m w_{t-1}^m} \nabla \log w_{t-1}^\ell \right]$$

where

$$c_t = \mathbb{E}_{s(\cdot) \tilde{\phi}(\cdot; \lambda)} \left[ \sum_{t'=t}^T \log \left( \frac{1}{N} \sum_{i=1}^N w_{t'}^i \right) \right].$$

In practice we use a stochastic estimate of  $c_t$ .

For  $T = 2$  we can use a leave-one-out estimator of the ancestor variable score function gradient

$$\sum_{i=1}^N \mathbb{E}_{s(\cdot) \tilde{\phi}(\cdot; \lambda)} \left[ \log \left( \frac{N-1}{N} \frac{\sum_{\ell=1}^N w_2^\ell}{\sum_{j \neq i} w_2^j} \right) \left( \nabla \log w_1^{a_1^i} - \sum_{\ell=1}^N \frac{w_1^\ell}{\sum_m w_1^m} \nabla \log w_1^\ell \right) \right].$$

**Score Function Gradient** Below we provide the derivation of a score function-like estimator that is applicable in very general settings. However, we have found that in practice the variance tends to be quite high.

$$\begin{aligned} \nabla \tilde{\mathcal{L}}(\lambda) &= \nabla \mathbb{E}_{\tilde{\phi}(x_{1:T}^{1:N}, a_{1:T-1}^{1:N}; \lambda)} [\log \hat{p}(y_{1:T})] \\ &= \mathbb{E}_{\tilde{\phi}(x_{1:T}^{1:N}, a_{1:T-1}^{1:N}; \lambda)} \left[ \nabla \log \hat{p}(y_{1:T}) + \log \hat{p}(y_{1:T}) \nabla \log \tilde{\phi}(x_{1:T}^{1:N}, a_{1:T-1}^{1:N}; \lambda) \right], \end{aligned}$$

with

$$\nabla \log \hat{p}(y_{1:T}) = \nabla \sum_{t=1}^T \log \left( \frac{1}{N} \sum_{i=1}^N w_t^i \right) = \sum_{t=1}^T \sum_{i=1}^N \frac{w_t^i}{\sum_\ell w_t^\ell} \nabla \log w_t^i,$$

and

$$\begin{aligned} \nabla \log \tilde{\phi}(x_{1:T}^{1:N}, a_{1:T-1}^{1:N}; \lambda) &= \sum_{i=1}^N \left[ \nabla \log r(x_1^i; \lambda) + \sum_{t=2}^T \left[ \nabla \log r(x_t^i | x_{t-1}^{a_{t-1}^i}; \lambda) + \nabla \log w_{t-1}^{a_{t-1}^i} - \sum_{\ell=1}^N \bar{w}_{t-1}^\ell \nabla \log w_{t-1}^\ell \right] \right]. \end{aligned}$$

### A.4 Scaling With Dimension

In this section we study how the methods compare on a simple toy model defined by

$$p(x_{1:T}, y_{1:T}) = \prod_{t=1}^T \mathcal{N}(x_t; 0, 1) \mathcal{N}(y_t; x_t^2, 1).$$

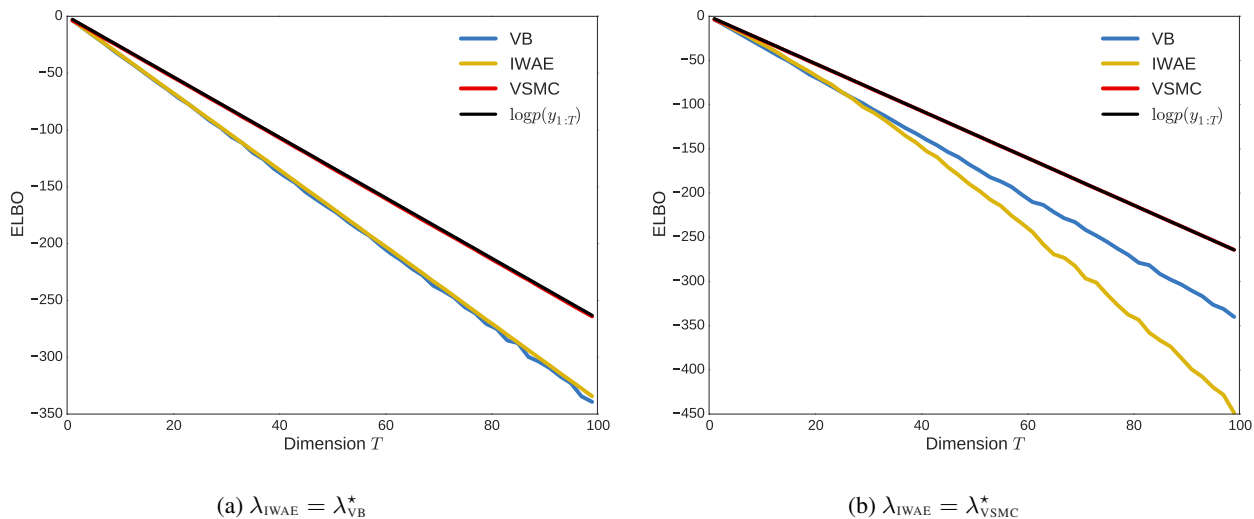

Figure 6: ELBO, for standard VB, IWAE, and VSMC, as a function of the dimension  $T$  of a toy problem. Here we set the number of samples in IWAE and VSMC to be  $N = 2T$ .

We study the data set  $y_t = 3, \forall t$ . Figure 6 shows the result when we let the number of samples in importance weighted auto-encoder (IWAE) (variational importance sampling (VIS)) and VSMC grow with the dimension  $N = 2T$ . For low  $T$  the optimal parameters for IWAE are close to  $\lambda_{\text{VSMC}}^*$ . On the other hand for high  $T$ , the optimal parameters for IWAE are close to those of standard variational Bayes (VB), i.e.  $\lambda_{\text{VB}}^*$ . Figure 6 indicates that just by letting  $N \propto T$ , VSMC can achieve arbitrarily good approximation of  $p(x_{1:T} | y_{1:T})$  even if  $T \rightarrow \infty$ . This holds, under some regularity conditions, even if  $p(x_{1:T}, y_{1:T})$  is a state space model [Bérard et al., 2014]. This asymptotic approximation property is not satisfied by VIS, we see in Figure 6 that the approximation deteriorates as  $T$  increases. Note that this does not hold if the dimension of the latent space, i.e.  $\dim(x_t)$ , tends to infinity rather than the number of time points  $T$ .
